# Supplementary material
Source: Springer Nature journal article supplement (https://www.springermedizin.de/resource/supplementary/13102_2013_48_MOESM4_ESM.pdf/9686494)
Supplement: MOESM4 [file 9686494]

# Table 1

Table 1. The training program for young participants.

| Week                               | Load (RM)                  | Sets                               | Inter-set rest (min)       | Sessions per week |
|------------------------------------|----------------------------|------------------------------------|----------------------------|-------------------|
| 1-6                                | 9-11                       | 3                                  | 1                          | 4                 |
| 7-10                               | 6-8                        | 3-4                                | 1.5                        | 4                 |
| Upper-body<br>exercises #1         | Lower-body<br>exercises #1 | Upper-body<br>exercises #2         | Lower-body<br>exercises #2 |                   |
| Bench press                        | Squat                      | Incline chest press                | Deadlift                   |                   |
| Dumbbell flyes                     | Lunge                      | Pullover                           | Lunge                      |                   |
| Standing shoulder press            | Knee-extension             | Lateral rise                       | Leg press                  |                   |
| Triceps push-down                  | Straight leg deadlift      | Pulldown (narrow grip)             | Knee-flexion               |                   |
| Sited rowing                       | Standing calf raise        | Standing over-bent rowing          | Standing calf raise        |                   |
| Pull-down (wide grip)              | Self-elected abdominal     | Biceps-curl (scott curl)           | Self-elected abdominal     |                   |
| Self-elected abdominal<br>exercise | exercise                   | Self-elected abdominal<br>exercise | exercise                   |                   |
